# Supplementary material
Source: PubMed Central journal article supplement (PMC3623935)
Supplement: NIHMS450797-supplement-1_si_001.pdf [file NIHMS450797-supplement-1_si_001.pdf]

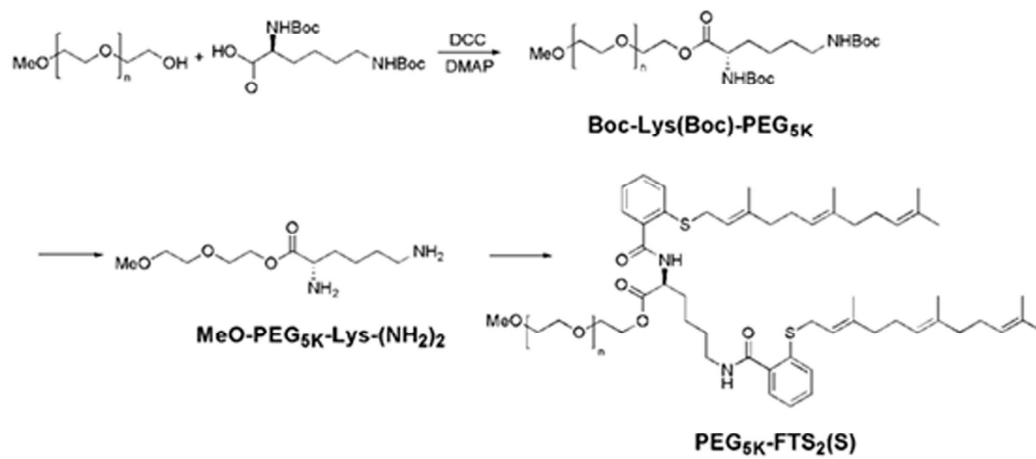

**Figure S1.** Synthesis scheme of PEG<sub>5K</sub>-FTS<sub>2</sub>(S) conjugate.

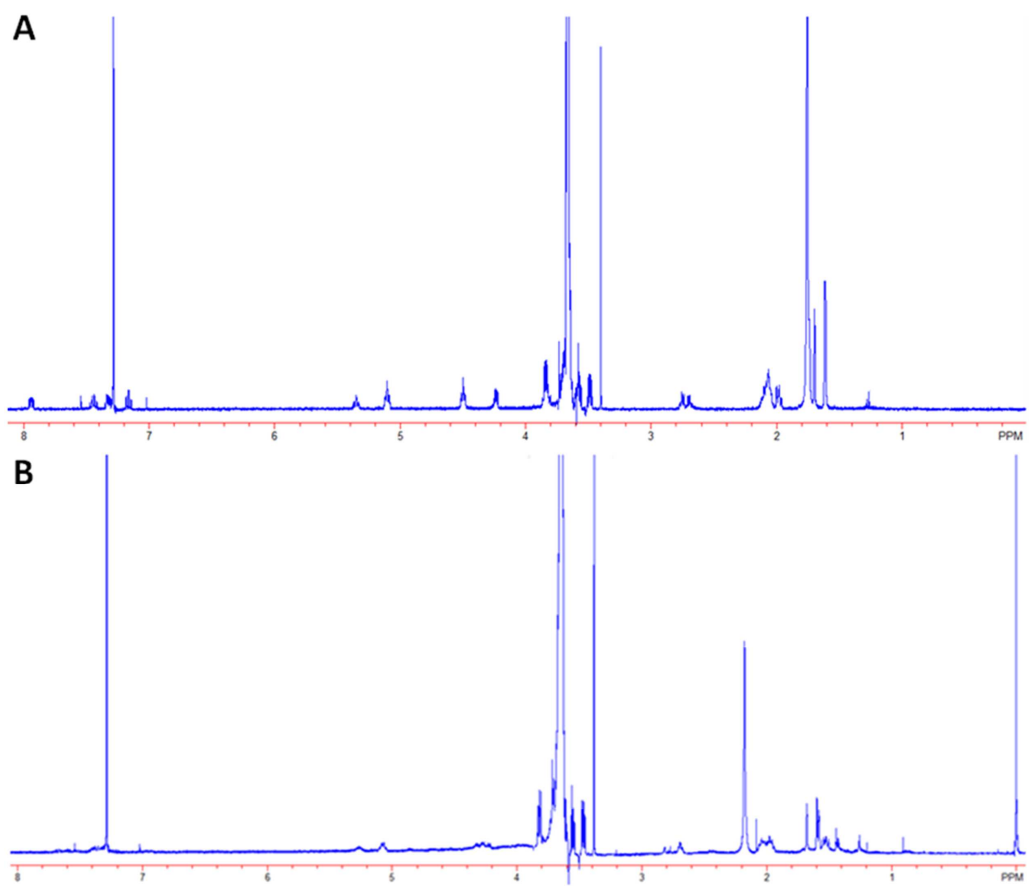

**Figure S2.** <sup>1</sup>H NMR spectra (400 MHz) of PEG<sub>5K</sub>-FTS<sub>2</sub>(L) (A) and PEG<sub>5K</sub>-FTS<sub>2</sub>(S) (B) conjugate in CDCl<sub>3</sub>.

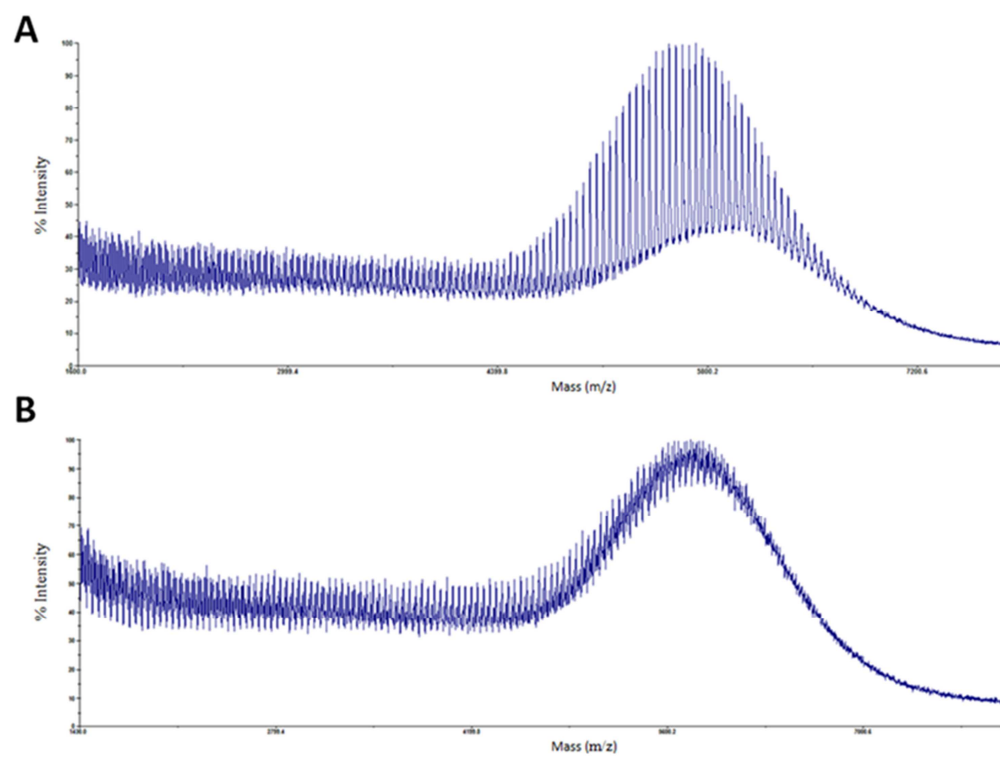

**Figure S3.** MALDI-TOF of PEG<sub>5K</sub>-FTS<sub>2</sub>(L) (A) and PEG<sub>5K</sub>-FTS<sub>2</sub>(S) (B) conjugate.

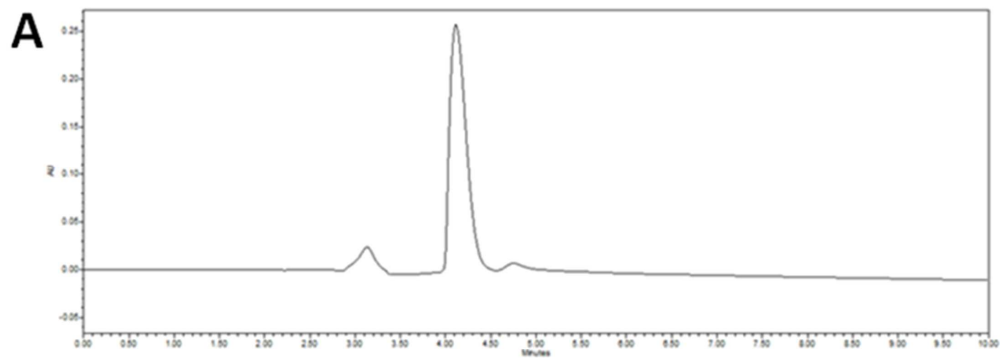

| Retention Time | Area    | % Area | Height |
|----------------|---------|--------|--------|
| 4.114          | 3321524 | 95.42  | 259520 |
| 4.748          | 159410  | 4.58   | 9002   |

Purity=95.42%

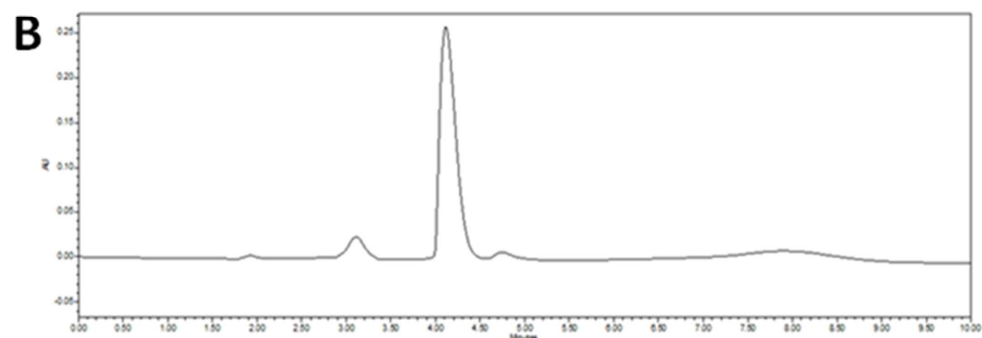

| Retention Time | Area    | % Area | Height |
|----------------|---------|--------|--------|
| 4.115          | 3216210 | 96.23  | 258278 |
| 4.744          | 125965  | 3.77   | 8233   |

Purity=96.23%

**Figure S4.** HPLC trace of PEG<sub>5K</sub>-FTS<sub>2</sub>(L) (A) and PEG<sub>5K</sub>-FTS<sub>2</sub>(S) (B) conjugate.
